# Supplementary material for: Immune and genomic biomarkers of immunotherapy response in cancer of unknown primary
Source: HighWire-hosted journal article supplement (doi:10.1136/jitc-2022-005809), 2023-01-01
Supplement: jitc-2022-005809supp002_data_supplement.xlsx [file jitc-2022-005809supp002_data_supplement.xlsx]

## Sheet: Sup table 2
Sup Table 2. 35 immune related genes included in the Nanostring panel. Overlap of genes with published studies which evaluated immune signatures for predicting immunotherapy response in cancer
NanoString panel genes	Cluster	Cell type group	Study Immunotherapy Response score	Cristescu, R. 2018 (Science)	Ayers, M. 2017 (J Clin Invest) Preliminary IFN-γ 10-gene signature	Ayers, M. 2017 (J Clin Invest) “preliminary expanded immune” signature	Ayers, M. 2017 (J Clin Invest) “IFN-γ (6-gene)” signature	Gide, T. N. 2019 (Cancer Cell) Anti-PD1 signature	Fehrenbacher, L. 2016 (The Lancet) IFNγ/Effector T cell signature
CD19	B cell	Lymphocyte
CD79B	B cell	Lymphocyte
MS4A1	B cell	Lymphocyte
ESM1	Endothelial cells	Endothelial cells
PECAM1	Endothelial cells	Endothelial cells
COL1A1	Fibroblast	Fibroblast
CTGF	Fibroblast	Fibroblast
FAP	Fibroblast	Fibroblast
THBS2	Fibroblast	Fibroblast
CD80	Immune checkpoint molecules
CTLA4	Immune checkpoint molecules
HAVCR2	Immune checkpoint molecules
PDCD1	Immune checkpoint molecules		Y					Y
CD160	NK Cells	Lymphocyte
CD244	NK Cells	Lymphocyte
GZMA	Cytotoxic Molecules		Y		Y	Y			Y
GZMB	Cytotoxic Molecules		Y			Y			Y
PRF1	Cytotoxic Molecules		Y		Y	Y
CD274	Immune checkpoint molecules		Y	Y
IDO1	Immune checkpoint molecules		Y	Y	Y	Y	Y	Y
LAG3	Immune checkpoint molecules		Y	Y		Y		Y
PDCD1LG2	Immune checkpoint molecules		Y	Y
CXCL10	Inflammatory molecules		Y		Y		Y		Y
CXCL9	Inflammatory molecules		Y	Y	Y	Y	Y		Y
IFNG	Inflammatory molecules		Y		Y		Y	Y	Y
CD8A	T cell	Lymphocyte	Y	Y				Y	Y
CD8B	T cell	Lymphocyte	Y					Y
EOMES	Transcription factor		Y						Y
TBX21	Transcription factor		Y					Y	Y
CXCL8	Inflammatory molecules
IL6	Inflammatory molecules
PTGS2	Inflammatory molecules
CD68	Macrophage	Macrophage
PRDM1	Transcription factor
FOXP3	Treg	Lymphocyte
