# Supplementary material for: Immune and genomic biomarkers of immunotherapy response in cancer of unknown primary
Source: HighWire-hosted journal article supplement (doi:10.1136/jitc-2022-005809), 2023-01-01
Supplement: jitc-2022-005809supp003_data_supplement.xlsx [file jitc-2022-005809supp003_data_supplement.xlsx]

## Sheet: Sup table 3
Sup Table 3. Metastatic cancers of known origin types
Cancer type	Number of samples
Bladder	5
Breast	12
Cholangio	11
Colorectal	17
Gastric	15
Kidney	11
Liver	4
Lung	10
Melanoma	17
Mesothelioma	5
Neuro	11
Ovarian	11
Pancreas	10
Prostate	10
Sarcoma	7
SCC	16
Testicular	7
Thyroid	9
Grand Total	188
