# Supplementary material for: Immune and genomic biomarkers of immunotherapy response in cancer of unknown primary
Source: HighWire-hosted journal article supplement (doi:10.1136/jitc-2022-005809), 2023-01-01
Supplement: jitc-2022-005809supp005_data_supplement.xlsx [file jitc-2022-005809supp005_data_supplement.xlsx]

## Sheet: Sup table 5
Sup Table 5. Clinical and genomic characteristics of immunotherapy treated CUP patients
ID	Treatment	Drug target	Line of treatment	Cycles	Response	Assigned putative diagnosis or Oncotree class	Resolved	Assessed as part of genomics informed pathology review	FDA approved TOO	PD-L1 staining	TILs	TMB	TMB level	IR score	COSMIC V2 Mutational Signature	Putative Resistance Genes	Treatment access	Reason for treatment
1137	BGB-A425 and Tislelizumab	anti-TIM-3 and anti-PD-1	1	4	CR	AD CK7+CK20+	No	Yes	No	0.7	NA	11.3603	High	High	NA	NA	Trial	Phase 1/2 clinical trial (tumour agnostic)
7031	Ipililumab and Nivolumab	anti-CTLA4 and anti-PD-1	1	NA	CR	Pleomorphic Carcinoma of the Lung	Yes	Yes	Yes	NA	NA	35.0686	High	Med	4	PTEN, KRAS amplification	Suspected tissue of origin	PBS for Melanoma
1013	Tislelizumab and Pamiparib	anti-PD-1 and PARP inhibitor	3	2	PD	Ovarian/Fallopian tube	Yes	Yes	No	NA	NA	4.93924	Low	High	NA	NA	Trial	Trial for gyae
1033	Pembrolizumab	anti-PD-1	3	NA	PD	AD CK7+CK20-	No	Yes	No	NA	NA	4.93924	Low	Med	NA	NA	Self funded	self funded
1050	Tislelizumab	anti-PD-1	3	2	PD	Cholangiocarcinoma	Yes	Yes	No	NA	NA	2.96355	Low	NA	NA	NA	Trial	Trial BGB-A317 met Cholangiocarcinoma
1082	Nivolumab	anti-PD-1	2	4	PD	AD CK7+CK20+	No*	No	No	NA	0.1	1.48177	Low	NA	NA	NA	Suspected tissue of origin	PBS for NSCLC
1103	Durvalumab	anti-PD-L1	2	3	PD	SCC Thymus	Yes	Yes	No	0.1	NA	3.45747	Low	Low	NA	STK11	Compassionate access	compassionate for lung
1105	Nivolumab	anti-PD-1	2	7	PD	Lung	Yes	Yes	Yes	0.01	0.02	7.40887	Low	Low	4	NA	Suspected tissue of origin	PBS for NSCLC
2017	Nivolumab	anti-PD-1	2	4	PD	AD CK7+CK20-	No	Yes	No	NA	0.05	1.9757	Low	Low	NA	NA	Suspected tissue of origin	PBS for NSCLC
4015	Pembrolizumab	anti-PD-1	1	7	PD	Lung	Yes	Yes	Yes	0.7	0.05	2.96355	Low	Med	NA	KRAS	Trial	Trial access PDL1 score/ NSCLC sarcomatoid
5007	Pembrolizumab	anti-PD-1	3	2	PD	Cholangiocarcinoma	Yes	Yes	No	NA	NA	3.9514	Low	NA	NA	NA	Trial	Trial keynote158 for met Cholangiocarcinoma
B015	Nivolumab	anti-PD-1	2	5	PD	Lung	Yes	Yes	Yes	0.9	0.5	4.93924	Low	High	NA	STK11 (NP_000446.1:p.(Gly56Trp)) and KEAP1 (NP_987096.1:p.(Glu582*)	Suspected tissue of origin	PBS PDL1 score and suspected lung
B018	Nivolumab	anti-PD-1	2	1	PD	SCCNOS	No	Yes	No	NA	0.05	4.44532	Low	Med	NA	NA	Suspected tissue of origin	PBS SCC lung
1051	Pembrolizumab	anti-PD-1	2	4	PR	Melanoma	Yes	Yes	Yes	1	NA	5.43317	Low	High	7	NA	Suspected tissue of origin	PBS BRAF-NRAS mutated Melanoma regimen
1118	Genolimzumab	anti-PD-1	1	5	PR	AD CK7+CK20-	No	Yes	No	0.5	0.4	NA	NA	High	NA	NA	Trial	Trial (tissue agnostic)
4001	Pembrolizumab	anti-PD-1	5	6	PR	Lymphoma	Yes*	No	Yes	NA	NA	NA	NA	High	NA	KRAS	Self funded	Self funded
7030	Nivolumab	anti-PD-1	2	11	PR	SCC cutaneous	Yes	Yes	Yes	NA	NA	4.44532	Low	High	NA	NA	Suspected tissue of origin	PBS for Head and Neck SCC
B012	Nivolumab	anti-PD-1	2	14	PR	SCC cutaneous	Yes	Yes	Yes	NA	0.3	149.165	High	High	7	NA	Suspected tissue of origin	PBS for Head and Neck SCC
W010	Pembrolizumab	anti-PD-1	1	9	PR	UDMN	No	Yes	No	1	0.8	5.43317	Low	High	NA	NA	Suspected tissue of origin	PBS for Lung cancer
1034	Nivolumab	anti-PD-1	3	4	SD	AD CK7-CK20+	No*	No	No	NA	NA	NA	NA	Med	NA	NA	Compassionate access	compassiote access
1058	Nivolumab	anti-PD-1	3	12	SD	Lung	Yes	Yes	Yes	NA	NA	20.7448	High	NA	4	NA	Suspected tissue of origin	PBS for NSCLC
1129	MEDI5752 and Pembrolizumab	anti-PD-1 and CTLA-4	1	1	SD	UDMN	No	Yes	No	0.01	NA	4.44532	Low	Low	NA	NA	Trial	Phase 1 clinical trial (tumour agnostic)
1149	Pembrolizumab	anti-PD-1	1	8	SD	AD CK7+CK20-	No*	No	No	0	NA	0.987849	Low	Med	NA	KRAS, STK11	Suspected tissue of origin	PBS for Lung cancer
4011	Nivolumab or Ipilimumab (study drug)	anti-PD-1 or anti-CTLA4	1	NA	SD	Melanoma	Yes	Yes	Yes	0.3	NA	99.2788	High	High	7	KRAS	Trial	study drug CA-238 for melanoma
4013	Nivolumab	anti-PD-1	2	8	SD	Lung	Yes	Yes	Yes	NA	0.3	8.89064	Low	High	4	NA	Suspected tissue of origin	PBS for NSCLC
7010	Pembrolizumab	anti-PD-1	3	6	SD	Cholangiocarcinoma	Yes	Yes	No	0	NA	1.9757	Low	Med	NA	NA	Trial	Trial KEYNOTE-158 for met Cholangiocarcinoma
7025	Durvalumab	anti-PD-L1	2	4	SD	Lung	Yes	Yes	Yes	NA	NA	10.8663	High	High	4	NA	Suspected tissue of origin	PBS for Lung cancer
7035	Atezolizumab	anti-PD-1	1	7	SD	Lung	Yes	Yes	Yes	NA	NA	4.44532	Low	Med	NA	NA	Suspected tissue of origin	PBS for Lung cancer
