# Supplementary material for: Immune and genomic biomarkers of immunotherapy response in cancer of unknown primary
Source: PubMed Central journal article supplement — J Immunother Cancer. 2023 Jan 31;11(1):e005809. doi: 10.1136/jitc-2022-005809 (PMC10098268; doi:10.1136/jitc-2022-005809), 2023-01-31
Supplement: jitc-2022-005809supp006.pdf [file jitc-2022-005809supp006.pdf]

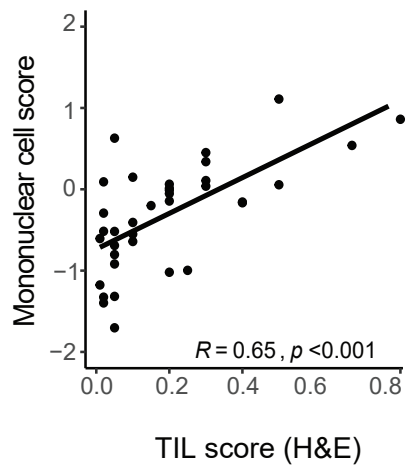

Supplementary Figure 1: Comparison of histopathology tumor-infiltrating monocytes (Monocyte score) by H&E (n=40) correlated with z-score normalized mononuclear cell gene-expression scores (T cells and T-regulatory cells (CD8A, CD8B, FOXP3), NK cell markers (CD160, CD244), macrophages (CD68), B cells (CD19, CD79B and MS4A1)). Correlation calculated by Pearson's correlation coefficient (R).
