# Supplementary material for: Immune and genomic biomarkers of immunotherapy response in cancer of unknown primary
Source: PubMed Central journal article supplement — J Immunother Cancer. 2023 Jan 31;11(1):e005809. doi: 10.1136/jitc-2022-005809 (PMC10098268; doi:10.1136/jitc-2022-005809), 2023-01-31
Supplement: jitc-2022-005809supp007.pdf [file jitc-2022-005809supp007.pdf]

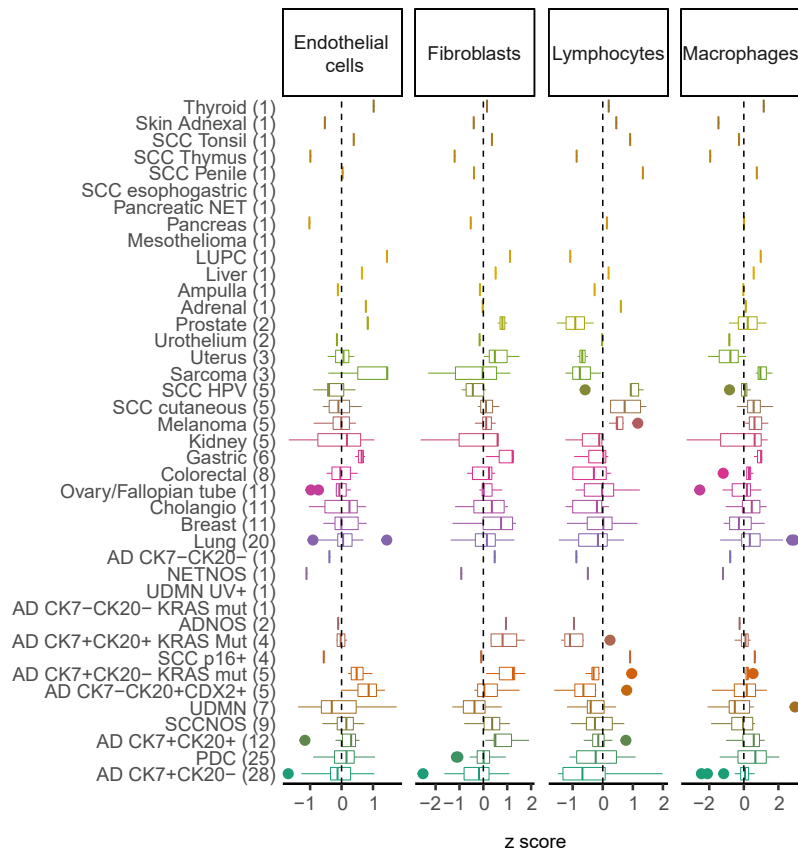

Supplementary Figure 2: Gene expression z score normalized lymphocyte, macrophage, fibroblast, and endothelial cell scores in CUP assigned putative TOO or OncoTree classes.
