# Supplementary material for: Immune and genomic biomarkers of immunotherapy response in cancer of unknown primary
Source: PubMed Central journal article supplement — J Immunother Cancer. 2023 Jan 31;11(1):e005809. doi: 10.1136/jitc-2022-005809 (PMC10098268; doi:10.1136/jitc-2022-005809), 2023-01-31
Supplement: jitc-2022-005809supp008.pdf [file jitc-2022-005809supp008.pdf]

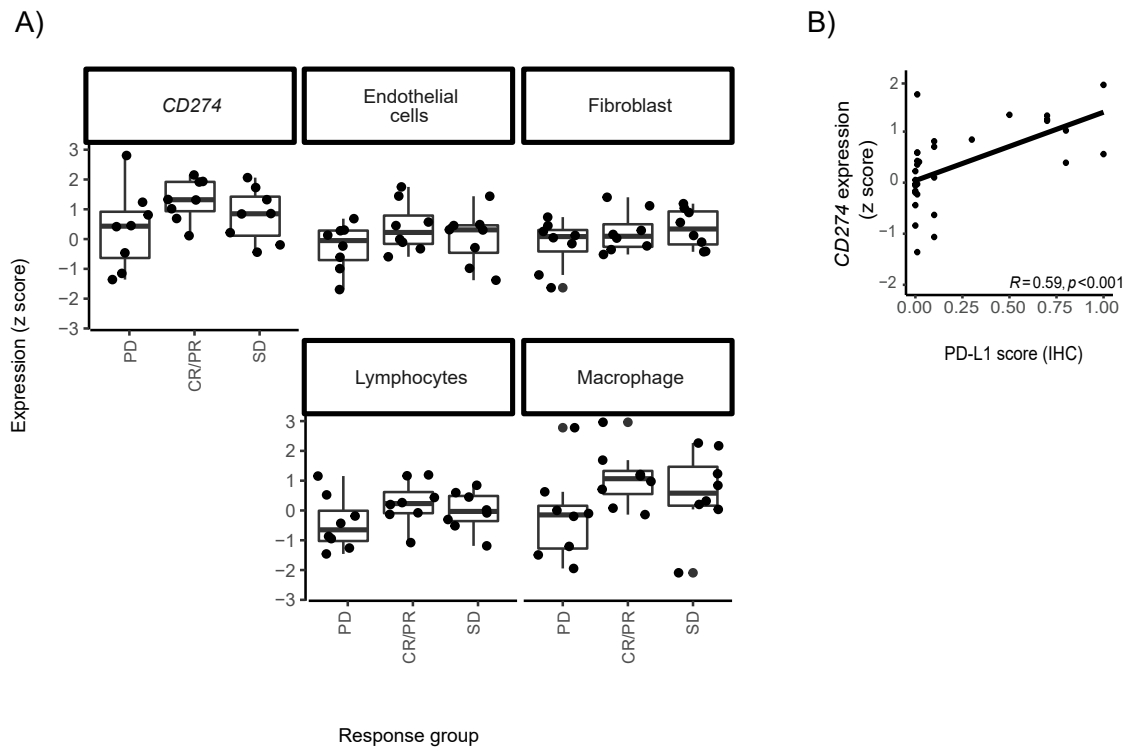

### Supplementary Figure 3:

Immunotherapy treated CUP expression markers and validation. A) Z score normalized gene expression scores for lymphocytes, macrophages, fibroblasts, and endothelial cells grouping CUP tumors by treatment response. Significance tested using paired sample T-test. B) Pearson's correlation of mRNA CD274 expression with PD-L1 IHC score (n=39).
